# Supplementary material for: High-Entropy Diborides—Silicon Carbide Composites by Reactive and Non-Reactive Spark Plasma Sintering: A Comparative Study
Source: MDPI journal article supplement (doi:10.3390/ma17030718), 2024-02-02
Supplement: s1 [file s1]

Supplementary Material for

**High-entropy diborides - Silicon carbide composites by reactive and non-reactive spark  
plasma sintering: a comparative study**

Ekaterina Pakhomova, Giacomo Cao, Roberto Orrù,

Sebastiano Garroni, Paolo Ferro, Roberta Licheri

Supplementary **Figures S1-S5** and **Tables S1- S4**

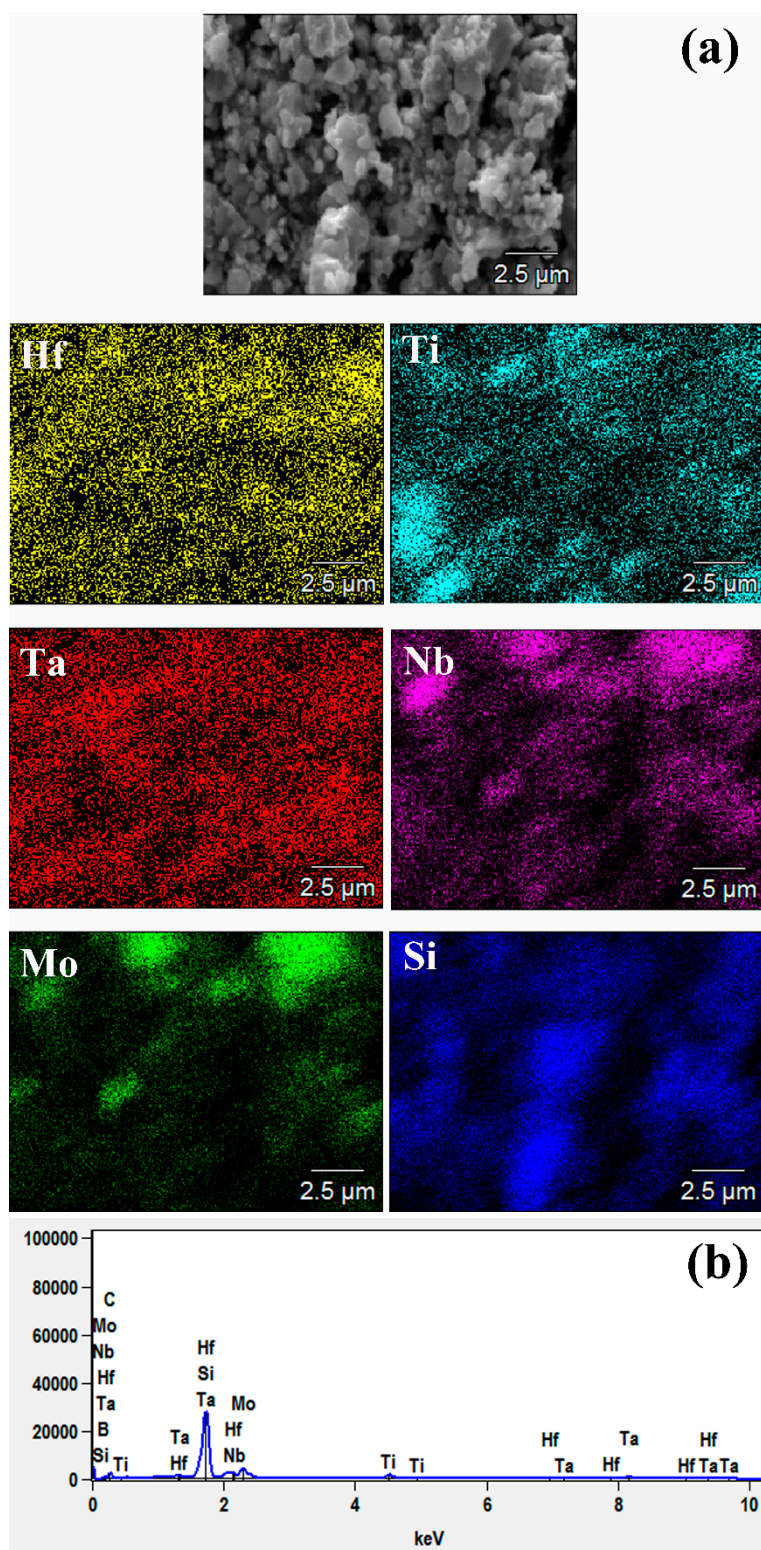

**Figure S1.** (a) SEM micrograph along with the corresponding EDS elemental maps, and (b) X-EDS pattern of HEB\_Nb-SiC powders synthesized by SHS

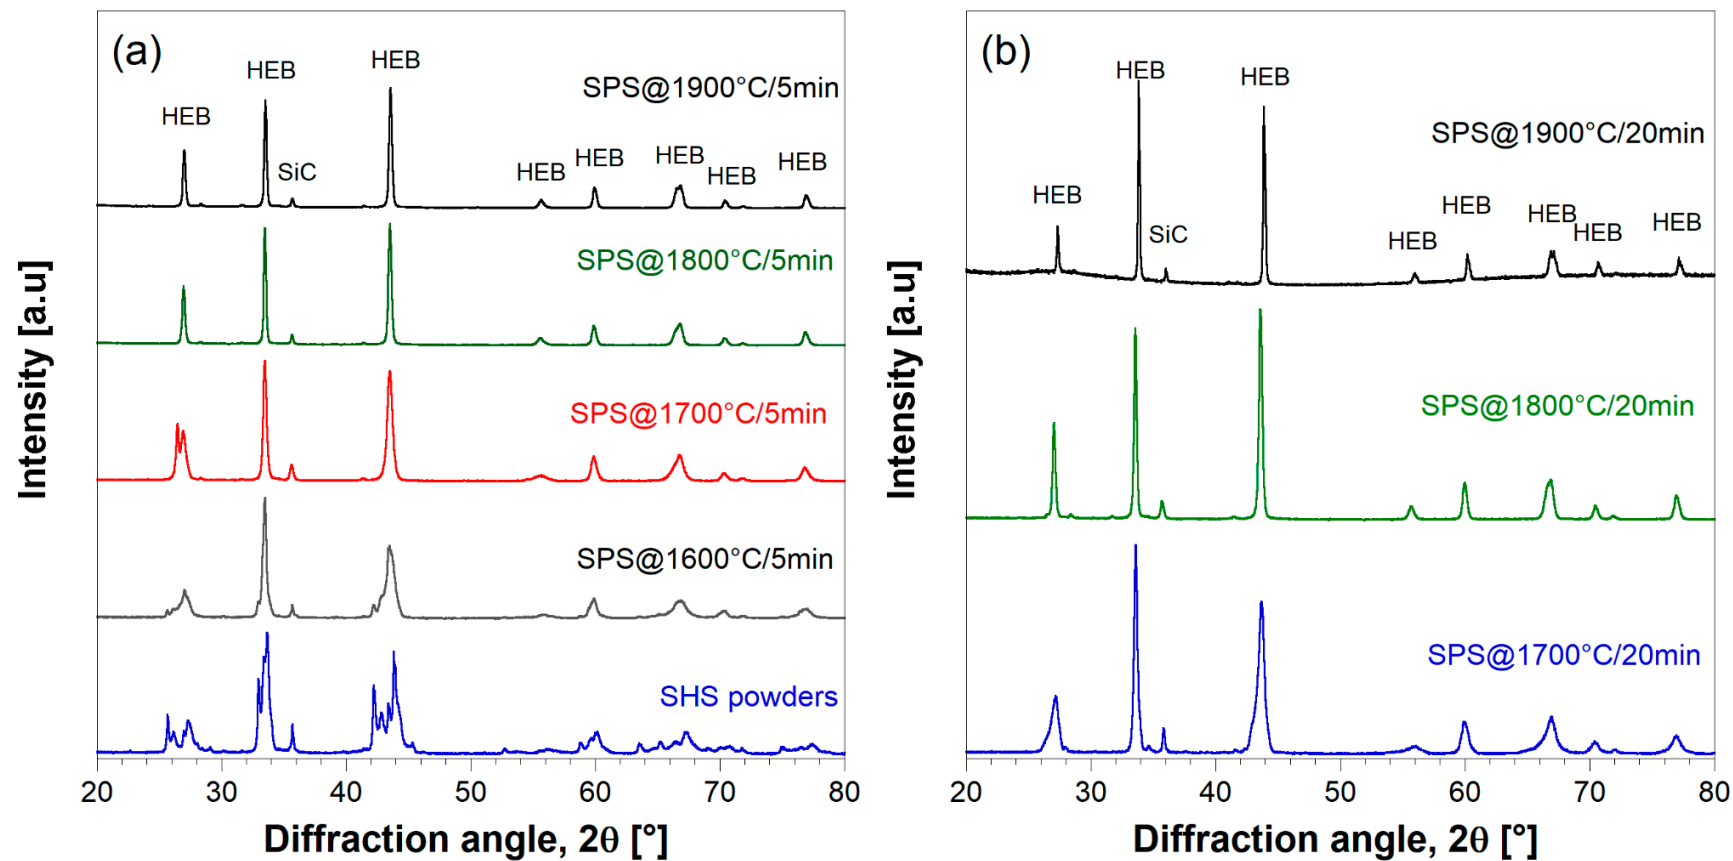

**Figure S2.** XRD patterns of HEB\_Nb-SiC products obtained by SHS-SPS at different  $T_D$  values: (a)  $t_D = 5$  min, (b)  $t_D = 20$  min. The XRD pattern of SHS powders is also included, for comparison.

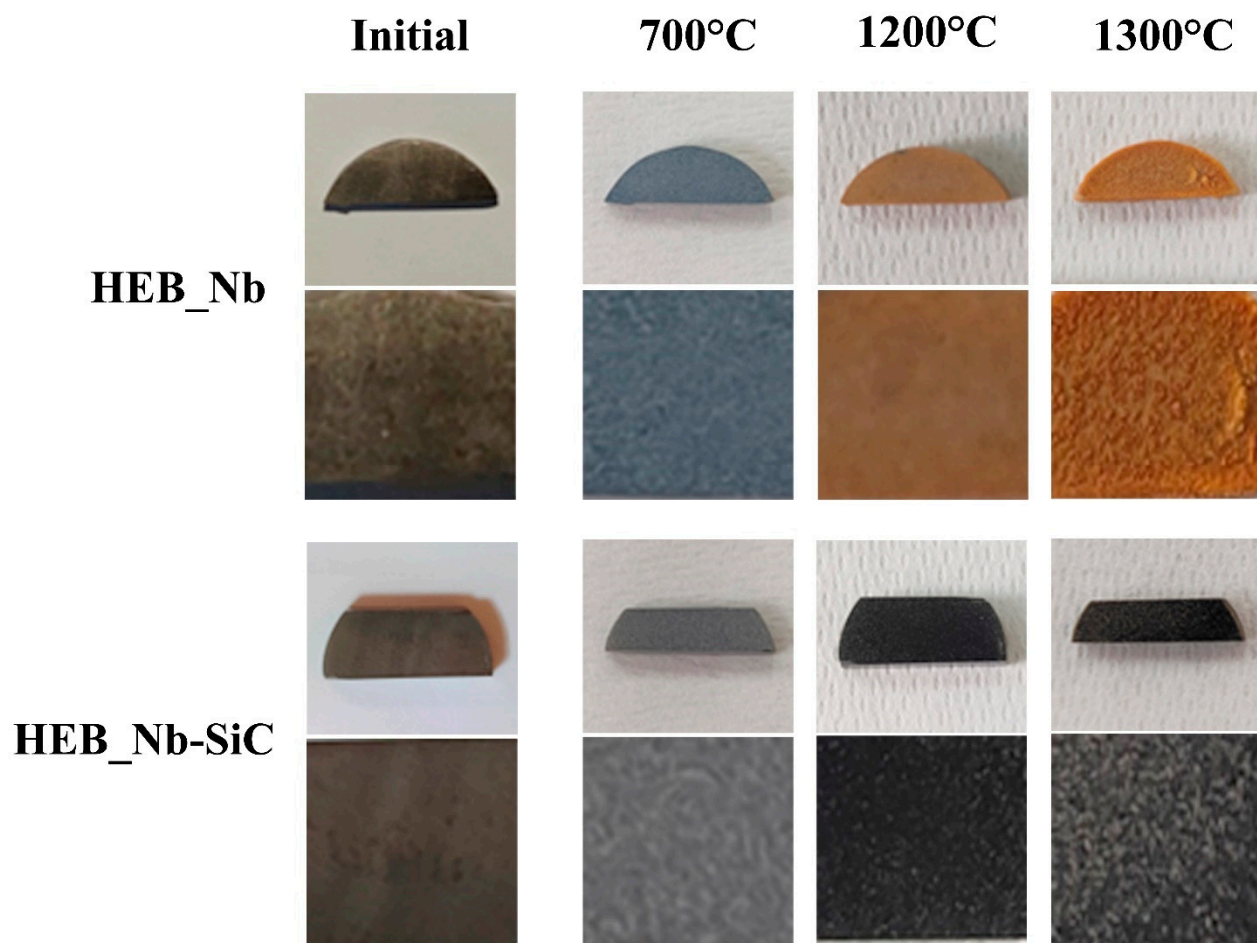

**Figure S3.** Optical images (complete and detailed view) showing the surface changes of  $(\text{Hf}_{0.2}\text{Mo}_{0.2}\text{Ti}_{0.2}\text{Ta}_{0.2}\text{Nb}_{0.2})\text{B}_2$  and  $(\text{Hf}_{0.2}\text{Mo}_{0.2}\text{Ti}_{0.2}\text{Ta}_{0.2}\text{Nb}_{0.2})\text{B}_2\text{-SiC}$  samples after oxidation experiments in air furnace at different temperatures.

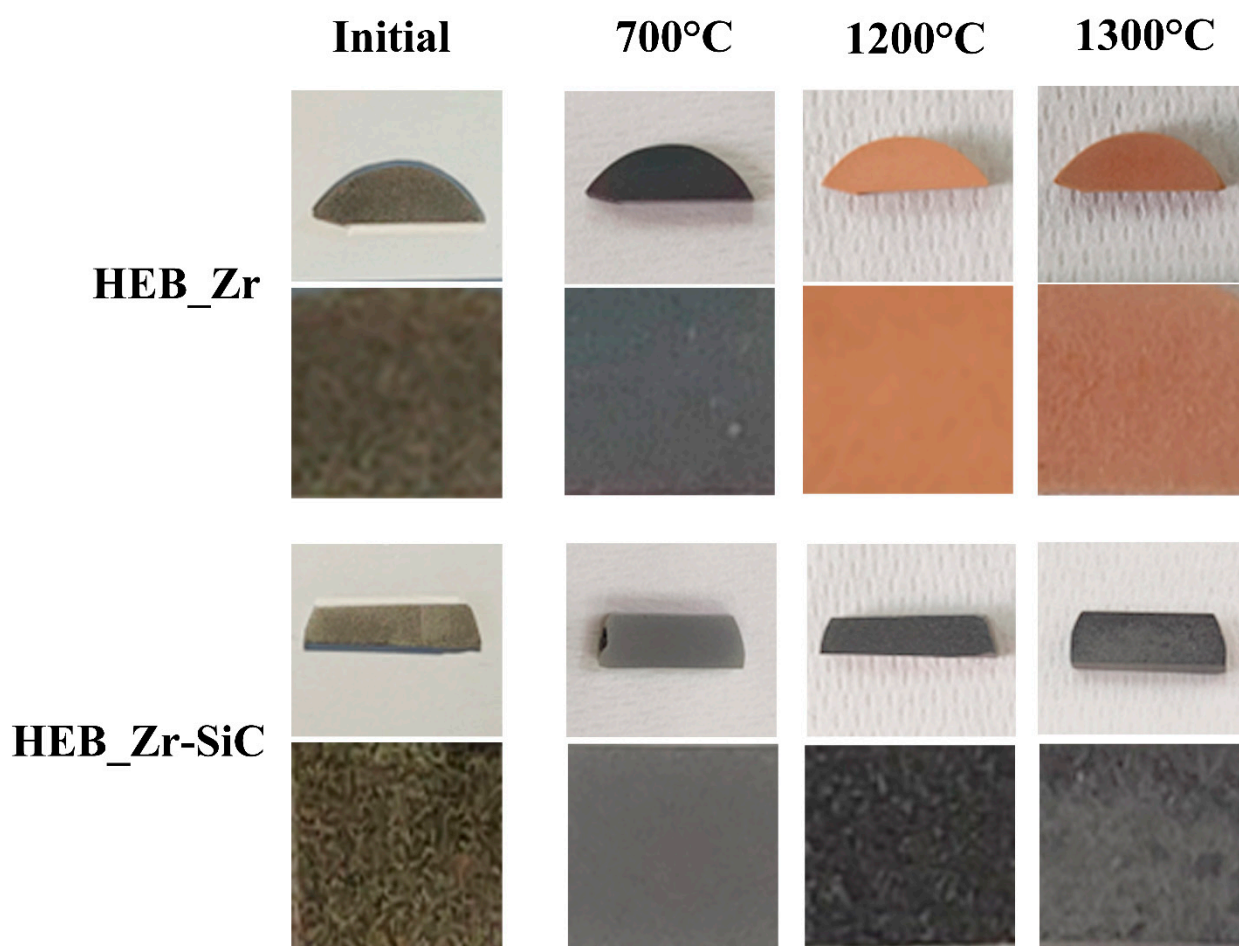

**Figure S4.** Optical images (complete and detailed view) showing the surface changes of  $(\text{Hf}_{0.2}\text{Mo}_{0.2}\text{Ti}_{0.2}\text{Ta}_{0.2}\text{Zr}_{0.2})\text{B}_2$  and  $(\text{Hf}_{0.2}\text{Mo}_{0.2}\text{Ti}_{0.2}\text{Ta}_{0.2}\text{Zr}_{0.2})\text{B}_2\text{-SiC}$  samples after oxidation experiments in air furnace at different temperatures.

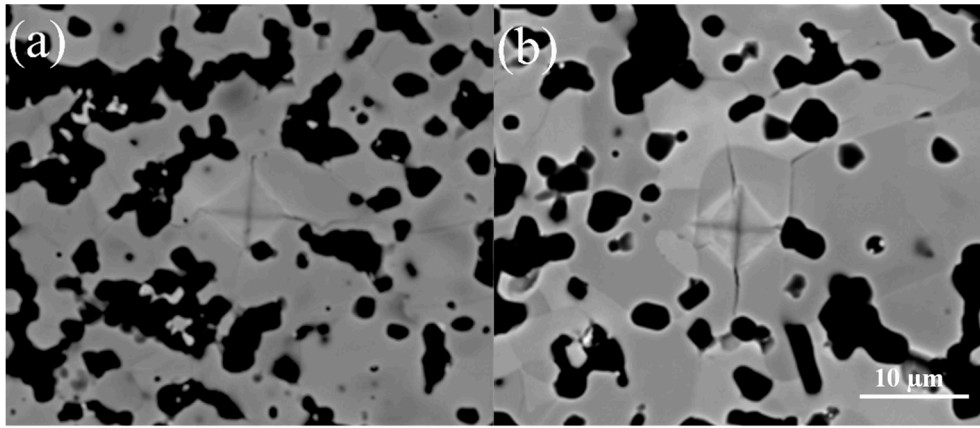

**Figure S5.** Example of SEM images showing the cracks propagated from the indent tips used to evaluate the fracture toughness of (a) the HEB\_Nb-SiC, and (b) HEB\_Zr-SiC samples.

#### Table S1-S4

Cif files from the Crystallography Open Database (COD) available at <https://www.crystallography.net/cod/index.php>, have used for the Rietveld refinement [37].

Bragg reflections belonging to the HEB\_Nb and HEB\_Zr solid solution phases have been interpolated modifying the cif file used for the system reported in the manuscript of Tallarita et al. [38].

For each phase the COD references are here below reported:

SiC: #1011031, MoB<sub>2</sub>: #1510765, (Ta<sub>0.5</sub>Ti<sub>0.5</sub>)B<sub>2</sub>: #1510835, NbB<sub>2</sub>: #1510778, TaB<sub>2</sub>: #1510843, TiB<sub>2</sub>: # 2002799, HfB<sub>2</sub>: # 1510711, (MoTi)B<sub>4</sub>: # 1510760, MoSi<sub>2</sub>: # 1010282, C: # 1200017, SiO<sub>2</sub>: # 1532513, Si: # 1526655, B<sub>4</sub>C: # 4124697, HfO<sub>2</sub>: # 1528988, ZrB<sub>2</sub>: # 1510856.

**Table S1.** Phases and quantitative phase analysis results of the **HEB\_Nb-SiC** product obtained by Reactive SPS. (SS): Solid Solution

| R-SPS (2000°C, 20 min)                                                                                               |         |        |       |        |       |           |             |                      |             |
|----------------------------------------------------------------------------------------------------------------------|---------|--------|-------|--------|-------|-----------|-------------|----------------------|-------------|
| Phase                                                                                                                | wt. (%) | a (Å)  | b (Å) | c (Å)  | β (°) | Symmetry  | Space Group | Crystallite size (Å) | Microstrain |
| (Hf <sub>0.2</sub> Mo <sub>0.2</sub> Ti <sub>0.2</sub> Ta <sub>0.2</sub> Nb <sub>0.2</sub> )B <sub>2</sub><br>(SS)-1 | 20.4    | 3.0974 | -     | 3.3196 | -     | Hexagonal | P6/mmm      | 1104                 | 4.59 E-4    |
| (Hf <sub>0.2</sub> Mo <sub>0.2</sub> Ti <sub>0.2</sub> Ta <sub>0.2</sub> Nb <sub>0.2</sub> )B <sub>2</sub><br>(SS)-2 | 20.3    | 3.0904 | -     | 3.3032 | -     | Hexagonal | P6/mmm      | 1092                 | 1.14 E-3    |
| SiC                                                                                                                  | 12.8    | 4.3529 | -     | 3.3196 | -     | Cubic     | F-43m       | >1500                | 1.24 E-3    |
| MoB <sub>2</sub>                                                                                                     | 16.7    | 3.1030 | -     | 3.2118 | -     | Hexagonal | P6/mmm      | 988                  | 1.53 E-4    |
| NbB <sub>2</sub>                                                                                                     | 15.1    | 3.0746 | -     | 3.2620 | -     | Hexagonal | P6/mmm      | 1006                 | 1.82 E-3    |
| (Ta <sub>0.5</sub> Ti <sub>0.5</sub> )B <sub>2</sub>                                                                 | 14.7    | 3.0496 | -     | 3.2381 | -     | Hexagonal | P6/mmm      | 991                  | 1.58 E-4    |



**Table S2.** Phases and quantitative phase analysis results of the **HEB\_Nb-SiC** product obtained by SHS

| SHS                                                                                                        |         |        |         |         |             |            |             |                      |             |
|------------------------------------------------------------------------------------------------------------|---------|--------|---------|---------|-------------|------------|-------------|----------------------|-------------|
| Phase                                                                                                      | wt. (%) | a (Å)  | b (Å)   | c (Å)   | $\beta$ (°) | Symmetry   | Space Group | Crystallite size (Å) | Microstrain |
| (Hf <sub>0.2</sub> Mo <sub>0.2</sub> Ti <sub>0.2</sub> Ta <sub>0.2</sub> Nb <sub>0.2</sub> )B <sub>2</sub> | 14.9    | 3.1051 | -       | 3.4182  | -           | Hexagonal  | P6/mmm      | 845                  | 4.93 E-3    |
| SiC                                                                                                        | 11.5    | 4.3614 | -       | -       | -           | Cubic      | F-43m       | >1500                | 3.09 E-3    |
| TaB <sub>2</sub>                                                                                           | 14.6    | 3.0769 | -       | 3.2720  | -           | Hexagonal  | P6/mmm      | 1125                 | 2.15 E-3    |
| TiB <sub>2</sub>                                                                                           | 13.4    | 3.0566 | -       | 3.2437  | -           | Hexagonal  | P6/mmm      | 1382                 | 4.21E-3     |
| NbB <sub>2</sub>                                                                                           | 12.8    | 3.1014 | -       | 3.3110  | -           | Hexagonal  | P6/mmm      | 1265                 | 1.58 E-3    |
| MoB <sub>2</sub>                                                                                           | 9.5     | 2.9870 | -       | 3.1920  | -           | Hexagonal  | P6/mmm      | 1038                 | 5.56 E-3    |
| HfB <sub>2</sub>                                                                                           | 9.0     | 3.1412 | -       | 3.4739  | -           | Hexagonal  | P6/mmm      | 1227                 | 1.21 E-3    |
| (MoTi)B <sub>4</sub>                                                                                       | 3.9     | 3.2788 | -       | 2.6036  | -           | Hexagonal  | P6/mmm      | 799                  | 1.46 E-3    |
| MoSi <sub>2</sub>                                                                                          | 2.9     | 3.2088 | -       | 7.8529  | -           | Tetragonal | I4/mmm      | 1077                 | 9.54 E-4    |
| C                                                                                                          | 2.9     | 2.4646 | -       | 6.7332  | -           | Hexagonal  | P63mc       | 1030                 | 1.28 E-3    |
| SiO <sub>2</sub>                                                                                           | 1.7     | 7.0669 | 12.3077 | 7.1960  | 120.4       | Monoclinic | C2/c:b1     | 896                  | 1.34 E-3    |
| Si                                                                                                         | 1.6     | 5.4375 | -       | -       | -           | Cubic      | Fd-3m:1     | 972                  | 1.43 E-3    |
| B <sub>4</sub> C                                                                                           | 1.3     | 5.6010 | -       | 12.2410 | -           | Trigonal   | R-3m:H      | 978                  | 1.1 E-4     |

**Table S3.** Phases and quantitative phase analysis results of the **HEB\_Nb-SiC** products obtained by SPS, at different operating conditions, from SHS powders.

| SPS (1800°C, 20 min)                                                                                       |         |        |        |        |       |            |             |                      |             |
|------------------------------------------------------------------------------------------------------------|---------|--------|--------|--------|-------|------------|-------------|----------------------|-------------|
| Phase                                                                                                      | wt. (%) | a (Å)  | b (Å)  | c (Å)  | β (°) | Symmetry   | Space Group | Crystallite size (Å) | Microstrain |
| (Hf <sub>0.2</sub> Mo <sub>0.2</sub> Ti <sub>0.2</sub> Ta <sub>0.2</sub> Nb <sub>0.2</sub> )B <sub>2</sub> | 83.1    | 3.0887 | -      | 3.3035 | -     | Hexagonal  | P6/mmm      | 1089                 | 1.33 E-3    |
| SiC                                                                                                        | 13.6    | 4.3605 | -      | -      | -     | Cubic      | F-43m       | >1500                | 1.43 E-3    |
| HfO <sub>2</sub>                                                                                           | 2.4     | 5.1201 | 5.1748 | 5.2851 | 99.1  | Monoclinic | P21/c:b1    | 974                  | 3.33 E-3    |
| C                                                                                                          | 0.9     | 2.4584 | -      | 6.7480 | -     | Hexagonal  | P63mc       | 1005                 | 2.72E-4     |

  

| SPS (1900°C, 5 min)                                                                                        |         |        |        |        |       |            |             |                      |             |
|------------------------------------------------------------------------------------------------------------|---------|--------|--------|--------|-------|------------|-------------|----------------------|-------------|
| Phase                                                                                                      | wt. (%) | a (Å)  | b (Å)  | c (Å)  | β (°) | Symmetry   | Space Group | Crystallite size (Å) | Microstrain |
| (Hf <sub>0.2</sub> Mo <sub>0.2</sub> Ti <sub>0.2</sub> Ta <sub>0.2</sub> Nb <sub>0.2</sub> )B <sub>2</sub> | 85.6    | 3.0887 | -      | 3.3035 | -     | Hexagonal  | P6/mmm      | 1319                 | 1.52 E-4    |
| SiC                                                                                                        | 13.0    | 4.3605 | -      | -      | -     | Cubic      | F-43m       | >1500                | 1.03 E-3    |
| HfO <sub>2</sub>                                                                                           | 1.4     | 5.1201 | 5.1748 | 5.2851 | 99.1  | Monoclinic | P21/c:b1    | 993                  | 6.05 E-4    |

| SPS (1900°C, 20 min)                                                                                       |         |        |        |        |          |            |             |                         |             |
|------------------------------------------------------------------------------------------------------------|---------|--------|--------|--------|----------|------------|-------------|-------------------------|-------------|
| Phase                                                                                                      | wt. (%) | a (Å)  | b (Å)  | c (Å)  | β<br>(°) | Symmetry   | Space Group | Crystallite size<br>(Å) | Microstrain |
| (Hf <sub>0.2</sub> Mo <sub>0.2</sub> Ti <sub>0.2</sub> Ta <sub>0.2</sub> Nb <sub>0.2</sub> )B <sub>2</sub> | 85.2    | 3.0891 | -      | 3.3027 | -        | Hexagonal  | P6/mmm      | 1517                    | 1.04 E-4    |
| SiC                                                                                                        | 13.7    | 4.3611 | -      | -      | -        | Cubic      | F-43m       | >1500                   | 1.31 E-3    |
| HfO <sub>2</sub>                                                                                           | 1.1     | 5.1248 | 5.1777 | 5.2948 | 99.3     | Monoclinic | P21/c:b1    | 1069                    | 1.21 E-4    |

**Table S4.** Phases and quantitative phase analysis results of the **HEB\_Zr-SiC** products obtained by SHS, and SPS.

| SHS                                                                                                        |         |        |         |         |             |            |             |                      |             |
|------------------------------------------------------------------------------------------------------------|---------|--------|---------|---------|-------------|------------|-------------|----------------------|-------------|
| Phase                                                                                                      | wt. (%) | a (Å)  | b (Å)   | c (Å)   | $\beta$ (°) | Symmetry   | Space Group | Crystallite size (Å) | Microstrain |
| (Hf <sub>0.2</sub> Mo <sub>0.2</sub> Ti <sub>0.2</sub> Ta <sub>0.2</sub> Zr <sub>0.2</sub> )B <sub>2</sub> | 11.9    | 3.1091 | -       | 3.4226  | -           | Hexagonal  | P6/mmm      | 1032                 | 5.28 E-3    |
| (MoTi)B <sub>4</sub>                                                                                       | 3.4     | 3.2902 | -       | 2.5892  | -           | Hexagonal  | P6/mmm      | 845                  | 3.66 E-3    |
| ZrB <sub>2</sub>                                                                                           | 13.7    | 3.0969 | -       | 3.3188  | -           | Hexagonal  | P6/mmm      | 1430                 | 3.52 E-3    |
| TaB <sub>2</sub>                                                                                           | 15.2    | 3.0758 | -       | 3.2806  | -           | Hexagonal  | P6/mmm      | 1197                 | 2.67 E-3    |
| HfB <sub>2</sub>                                                                                           | 10.7    | 3.1405 | -       | 3.4731  | -           | Hexagonal  | P6/mmm      | 1275                 | 2.45 E-3    |
| SiC                                                                                                        | 10.9    | 4.3613 | -       | -       | -           | Cubic      | F-43m       | >1500                | 5.55 E-4    |
| MoB <sub>2</sub>                                                                                           | 10.8    | 2.9741 | -       | 3.1920  | -           | -          | P6/mmm      | 1039                 | 2.69 E-3    |
| TiB <sub>2</sub>                                                                                           | 14.6    | 3.0567 | -       | 3.2424  | -           | -          | P6/mmm      | 1383                 | 4.17E-3     |
| MoSi <sub>2</sub>                                                                                          | 2.6     | 3.2086 | -       | 7.8408  | -           | -          | I4/mmm      | 1062                 | 1.24 E-3    |
| SiO <sub>2</sub>                                                                                           | 1.9     | 7.0685 | 12.3074 | 7.1961  | 120.4       | Monoclinic | C2/c:b1     | 799                  | 7.45 E-3    |
| C                                                                                                          | 1.8     | 2.4677 | -       | 6.7188  | -           | Hexagonal  | P63mc       | 1030                 | 1.17 E-3    |
| Si                                                                                                         | 1.3     | 5.4378 | -       | -       | -           | Cubic      | Fd-3m:1     | 972                  | 2.32 E-3    |
| B <sub>4</sub> C                                                                                           | 1.2     | 5.6005 | -       | 12.2459 | -           | Trigonal   | R-3m:H      | 999                  | 7.86 E-4    |

| SPS (1800°C, 20 min)                                                                                       |         |        |        |        |       |            |             |                      |             |
|------------------------------------------------------------------------------------------------------------|---------|--------|--------|--------|-------|------------|-------------|----------------------|-------------|
| Phase                                                                                                      | wt. (%) | a (Å)  | b (Å)  | c (Å)  | β (°) | Symmetry   | Space Group | Crystallite size (Å) | Microstrain |
| (Hf <sub>0.2</sub> Mo <sub>0.2</sub> Ti <sub>0.2</sub> Ta <sub>0.2</sub> Zr <sub>0.2</sub> )B <sub>2</sub> | 84.4    | 3.0976 | -      | 3.3628 | -     | Hexagonal  | P6/mmm      | 1229                 | 8.30 E-4    |
| SiC                                                                                                        | 14.1    | 4.3593 | -      | -      | -     | Cubic      | F-43m       | >1500                | 4.50 E-4    |
| HfO <sub>2</sub>                                                                                           | 1.5     | 5.1958 | 5.2193 | 5.3845 | 99.2  | Monoclinic | P21/c:b1    | 1069                 | 1.21 E-4    |
